# Supplementary material for: Hepatitis B Virus X Protein Stimulates Proliferation, Wound Closure and Inhibits Apoptosis of HuH-7 Cells via CDC42
Source: MDPI journal article supplement (doi:10.3390/ijms18030586), 2017-03-08
Supplement: s1 [file s1]

## Supplemental Data Legends

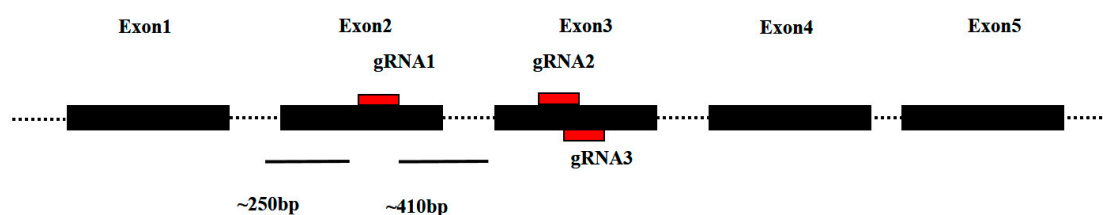

**Figure S1.** The target sequence of CRISPR/Cas 9 in CDC42 locus. We completely designed 3 pairs of gRNAs, one of which targeted at exon2, and the others which targeted at exon3.

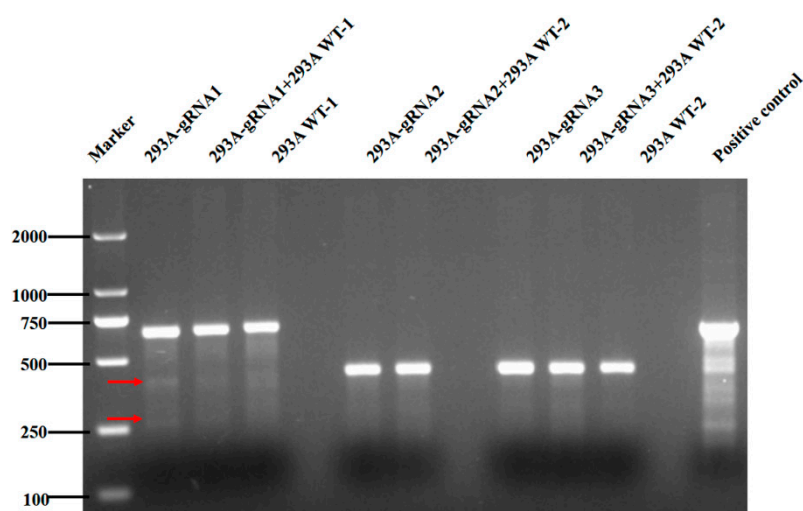

**Figure S2.** The T7E1 assay was used to detect the endogenous shear activity of gRNAs in 293A cells. 293A Cells were transected with gRNA1/2/3-Cas9 plasmids, respectively, and cultured for 2 days. Mutation frequencies were measured using the T7E1 assay. 500 ng PCR-amplified fragments from genomic DNA were used and generated bands of the expected sizes in targeted vs. non-targeted individuals.

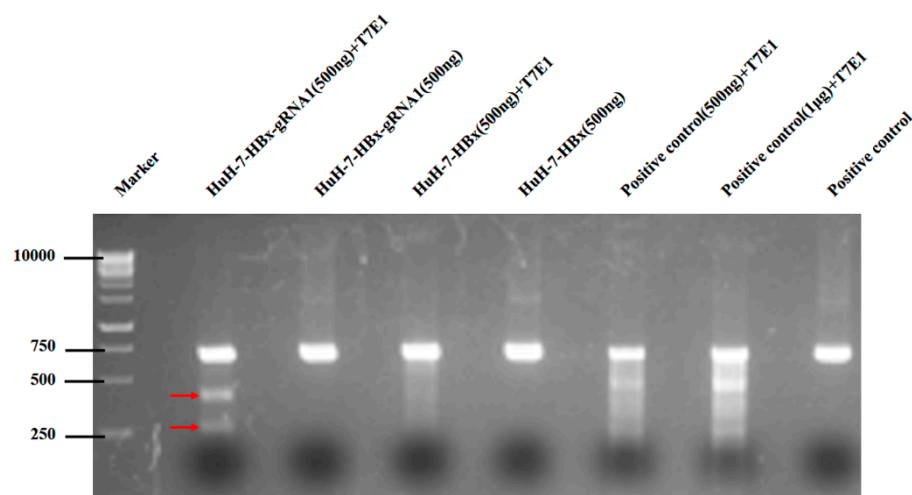

**Figure S3.** The T7E1 assay was used to detect the endogenous shear activity of gRNA1 in HuH-7-HBx cells. HuH-7-HBx cells were transfected with plasmids containing gRNA1-Cas9 and cultured for 2 days. Mutation frequencies were measured using the T7E1 assay.

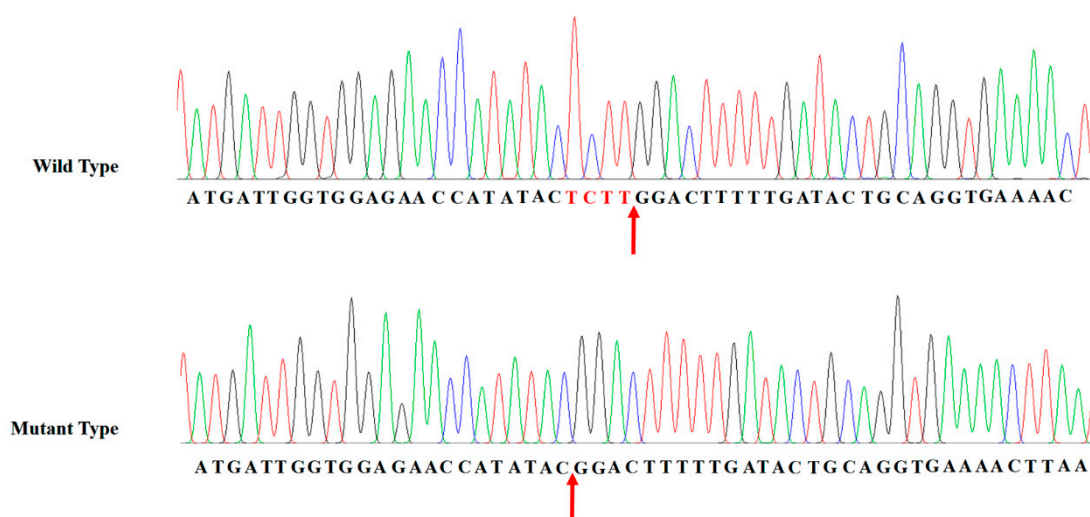

**Figure S4.** Chromatograms of DNA sequences of wild-type cells and edited cells obtained in this study. Chromatogram for the introduction of a 4 bp deletion within CDC42 ORF.

**Table S1.** The primers of HBx and GAPDH gene for RT-PCR.

| Gene name | Oligonucleotide sequence       |
|-----------|--------------------------------|
| HBx       | F:5'-GTCTCCTCTGACTTCAACAGCG-3' |
|           | R:5'-ACCACCCTGTTGCTGTAGCCAA-3' |
| GAPDH     | F:5'-CCGTCTGTGCCTTCTCATCTGC-3' |
|           | R:5'-CAAGGTCGGTCGTTGACATTGC-3' |

**Table S2.** Oligonucleotide sequence of CDC42 Exon2/3-gRNA.

| gRNA               | Oligonucleotide sequence                                                    |
|--------------------|-----------------------------------------------------------------------------|
| CDC42-Exon2-gRNA-1 | F: 5' -TGGAGAACCATATACTCT <b>TGG</b> -3'<br>R: 5' -CCAAGAGTATATGGTTCTCCA-3' |
| CDC42-Exon3-gRNA-1 | F: 5' -TGTTTGTGGATAACTCAG <b>CGG</b> -3'<br>R: 5' -CCGCTGAGTTATCCACAAACA-3' |
| CDC42-Exon3-gRNA-2 | F: 5' -TAGAAATACATCTGTTTGT <b>G</b> G-3'<br>R: 5' -CCACAAACAGATGTATTTCTA-3' |

**Table S3.** Monoclonal gene identification primer.

| Primer       | Oligonucleotide sequence      |
|--------------|-------------------------------|
| CDC42-g1-F   | 5' -GCAGAAATCTCAGAACACATCC-3' |
| CDC42-g1-R   | 5' -GGGAGAGAATCAGTGGGCA-3'    |
| CDC42-g2/3-F | 5' -CACTTTGAGGACACCAAGATTC-3' |
| CDC42-g2/3-R | 5' -GCAGTCTCTGGAGTGATAGGCT-3' |
