# Supplementary material for: Hepatitis B Virus X Protein Stimulates Proliferation, Wound Closure and Inhibits Apoptosis of HuH-7 Cells via CDC42
Source: Int J Mol Sci. 2017 Mar 8;18(3):586. doi: 10.3390/ijms18030586 (PMC5372602; doi:10.3390/ijms18030586)
Supplement: Supplementary file 1 [file ijms-18-00586-s001.zip › Table S4.xlsx]

## Sheet: differential expressed proteins
Table S4 The list of 523 differential expressed proteins
Gene ID	Gene symbol	Gene full name	Ratio a1
Q14624	ITIH4	Inter-alpha-trypsin inhibitor heavy chain H4	0.04
P09488	GSTM1	Glutathione S-transferase Mu 1	0.09
P09234	RU1C	U1 small nuclear ribonucleoprotein C	0.1
Q8IUS5	EPHX4	Epoxide hydrolase 4	0.13
Q9HBL0	TENS1	Tensin-1	0.14
Q9Y672	ALG6	Dolichyl pyrophosphate Man9GlcNAc2 alpha-1,3-glucosyltransferase	0.15
Q96CB8	INT12	Integrator complex subunit 12	0.17
Q5VT79	AXA81	Annexin A8-like protein 1	0.18
P07858	CATB	Cathepsin B	0.18
Q8TF42	UBS3B	Ubiquitin-associated and SH3 domain-containing protein B	0.19
P10586	PTPRF	Receptor-type tyrosine-protein phosphatase F	0.2
P28161	GSTM2	Glutathione S-transferase Mu 2	0.2
P25815	S100P	Protein S100-P	0.2
P35900	K1C20	Keratin, type I cytoskeletal 20	0.21
Q00587	BORG5	Cdc42 effector protein 1	0.21
Q9BY76	ANGL4	Angiopoietin-related protein 4	0.22
P14174	MIF	Macrophage migration inhibitory factor	0.22
Q8N6M0	OTU6B	OTU domain-containing protein 6B	0.24
P17936	IBP3	Insulin-like growth factor-binding protein 3	0.25
Q9UJM3	ERRFI	ERBB receptor feedback inhibitor 1	0.25
Q96SY0	VWA9	von Willebrand factor A domain-containing protein 9	0.25
O94762	RECQ5	ATP-dependent DNA helicase Q5	0.25
Q9BRP8	WIBG	Partner of Y14 and mago	0.28
P22352	GPX3	Glutathione peroxidase 3	0.28
Q9P055	JKAMP	JNK1/MAPK8-associated membrane protein	0.28
Q9H4B6	SAV1	Protein salvador homolog 1	0.28
P60953	CDC42	Cell division control protein 42 homolog	0.3
Q9UBI6	GBG12	Guanine nucleotide-binding protein G(I)/G(S)/G(O) subunit gamma-12	0.3
Q9BTX7	TTPAL	Alpha-tocopherol transfer protein-like	0.3
Q9Y2D0	CAH5B	Carbonic anhydrase 5B, mitochondrial	0.32
P01008	ANT3	Antithrombin-III	0.32
P62308	RUXG	Small nuclear ribonucleoprotein G	0.32
Q9H3M7	TXNIP	Thioredoxin-interacting protein	0.32
P58107	EPIPL	Epiplakin	0.33
Q8WX93	PALLD	Palladin	0.33
P00966	ASSY	Argininosuccinate synthase	0.33
Q969E8	TSR2	Pre-rRNA-processing protein TSR2 homolog	0.33
Q8IXM2	BAP18	Chromatin complexes subunit BAP18	0.34
Q9UBG0	MRC2	C-type mannose receptor 2	0.35
P12277	KCRB	Creatine kinase B-type	0.36
P08727	K1C19	Keratin, type I cytoskeletal 19	0.36
Q9Y2V2	CHSP1	Calcium-regulated heat stable protein 1	0.36
P07311	ACYP1	Acylphosphatase-1	0.36
Q9H867	MT21D	Protein-lysine methyltransferase METTL21D	0.36
Q9NRX3	NUA4L	NADH dehydrogenase [ubiquinone] 1 alpha subcomplex subunit 4-like 2	0.36
O95801	TTC4	Tetratricopeptide repeat protein 4	0.37
Q8IXM3	RM41	39S ribosomal protein L41, mitochondrial	0.37
P53794	SC5A3	Sodium/myo-inositol cotransporter	0.37
Q9P086	MED11	Mediator of RNA polymerase II transcription subunit 11	0.37
P07093	GDN	Glia-derived nexin	0.37
Q96A57	TM230	Transmembrane protein 230	0.37
Q96S55	WRIP1	ATPase WRNIP1	0.38
Q13765	NACA	Nascent polypeptide-associated complex subunit alpha	0.39
P05121	PAI1	Plasminogen activator inhibitor 1	0.39
Q9BX40	LS14B	Protein LSM14 homolog B	0.39
O14519	CDKA1	Cyclin-dependent kinase 2-associated protein 1	0.39
Q16610	ECM1	Extracellular matrix protein 1	0.39
Q9Y696	CLIC4	Chloride intracellular channel protein 4	0.4
O75410	TACC1	Transforming acidic coiled-coil-containing protein 1	0.4
O15212	PFD6	Prefoldin subunit 6	0.4
Q04760	LGUL	Lactoylglutathione lyase	0.41
P19404	NDUV2	NADH dehydrogenase [ubiquinone] flavoprotein 2, mitochondrial	0.41
Q8WUZ0	BCL7C	B-cell CLL/lymphoma 7 protein family member C	0.41
Q13332	PTPRS	Receptor-type tyrosine-protein phosphatase S	0.41
Q96SZ5	AEDO	2-aminoethanethiol dioxygenase	0.41
Q99643	C560	Succinate dehydrogenase cytochrome b560 subunit, mitochondrial	0.41
Q99417	MYCBP	C-Myc-binding protein	0.41
Q15434	RBMS2	RNA-binding motif, single-stranded-interacting protein 2	0.41
Q14699	RFTN1	Raftlin	0.41
O75558	STX11	Syntaxin-11	0.41
Q5T0N5	FBP1L	Formin-binding protein 1-like	0.41
Q6NXT6	TAPT1	Transmembrane anterior posterior transformation protein 1 homolog	0.41
Q9UPT8	ZC3H4	Zinc finger CCCH domain-containing protein 4	0.42
Q96B97	SH3K1	SH3 domain-containing kinase-binding protein 1	0.43
Q9NX46	ARHL2	Poly(ADP-ribose) glycohydrolase ARH3	0.43
P41236	IPP2	Protein phosphatase inhibitor 2	0.43
O75531	BAF	Barrier-to-autointegration factor	0.43
P07332	FES	Tyrosine-protein kinase Fes/Fps	0.43
O95363	SYFM	Phenylalanine--tRNA ligase, mitochondrial	0.43
Q9UL26	RB22A	Ras-related protein Rab-22A	0.44
Q86X02	CDR2L	Cerebellar degeneration-related protein 2-like	0.44
O94830	DDHD2	Phospholipase DDHD2	0.44
Q8NC44	F134A	Protein FAM134A	0.44
O00469	PLOD2	Procollagen-lysine,2-oxoglutarate 5-dioxygenase 2	0.45
P30740	ILEU	Leukocyte elastase inhibitor	0.45
Q9P016	THYN1	Thymocyte nuclear protein 1	0.45
Q9Y4Z0	LSM4	U6 snRNA-associated Sm-like protein LSm4	0.45
P52758	UK114	Ribonuclease UK114	0.45
Q9UBV8	PEF1	Peflin	0.45
Q9Y3X0	CCDC9	Coiled-coil domain-containing protein 9	0.45
P00395	COX1	Cytochrome c oxidase subunit 1	0.45
Q9NPA8	ENY2	Transcription and mRNA export factor ENY2	0.45
Q96C90	PP14B	Protein phosphatase 1 regulatory subunit 14B	0.45
P16949	STMN1	Stathmin	0.46
Q9UNN5	FAF1	FAS-associated factor 1	0.46
Q96FQ6	S10AG	Protein S100-A16	0.46
Q8IXK0	PHC2	Polyhomeotic-like protein 2	0.46
Q9Y394	DHRS7	Dehydrogenase/reductase SDR family member 7	0.46
P50443	S26A2	Sulfate transporter	0.46
Q9H9C1	SPE39	Spermatogenesis-defective protein 39 homolog	0.46
Q96JB2	COG3	Conserved oligomeric Golgi complex subunit 3	0.46
P30085	KCY	UMP-CMP kinase	0.47
O00151	PDLI1	PDZ and LIM domain protein 1	0.47
Q16790	CAH9	Carbonic anhydrase 9	0.47
Q13442	HAP28	28 kDa heat- and acid-stable phosphoprotein	0.47
Q96IZ0	PAWR	PRKC apoptosis WT1 regulator protein	0.47
Q9Y6A9	SPCS1	Signal peptidase complex subunit 1	0.47
Q2TAM9	TUSC1	Tumor suppressor candidate gene 1 protein	0.47
O75937	DNJC8	DnaJ homolog subfamily C member 8	0.48
Q9NRG4	SMYD2	N-lysine methyltransferase SMYD2	0.48
P62253	UB2G1	Ubiquitin-conjugating enzyme E2 G1	0.48
Q13643	FHL3	Four and a half LIM domains protein 3	0.48
Q8IVV2	LOXH1	Lipoxygenase homology domain-containing protein 1	0.48
Q86SF2	GALT7	N-acetylgalactosaminyltransferase 7	0.49
O95466	FMNL1	Formin-like protein 1	0.49
P98160	PGBM	Basement membrane-specific heparan sulfate proteoglycan core protein	0.49
P18846	ATF1	Cyclic AMP-dependent transcription factor ATF-1	0.49
Q9H5V8	CDCP1	CUB domain-containing protein 1	0.49
P35237	SPB6	Serpin B6	0.5
Q5T6V5	CI064	UPF0553 protein C9orf64	0.5
P11279	LAMP1	Lysosome-associated membrane glycoprotein 1	0.5
P61009	SPCS3	Signal peptidase complex subunit 3	0.5
Q16270	IBP7	Insulin-like growth factor-binding protein 7	0.5
O43678	NDUA2	NADH dehydrogenase [ubiquinone] 1 alpha subcomplex subunit 2	0.5
O00459	P85B	Phosphatidylinositol 3-kinase regulatory subunit beta	0.5
Q9H299	SH3L3	SH3 domain-binding glutamic acid-rich-like protein 3	0.5
P30047	GFRP	GTP cyclohydrolase 1 feedback regulatory protein	0.5
P99999	CYC	Cytochrome c	0.51
P55327	TPD52	Tumor protein D52	0.51
Q86WR0	CCD25	Coiled-coil domain-containing protein 25	0.51
O15446	RPA34	DNA-directed RNA polymerase I subunit RPA34	0.51
O75815	BCAR3	Breast cancer anti-estrogen resistance protein 3	0.51
Q8IV48	ERI1	3'-5' exoribonuclease 1	0.51
Q14678	KANK1	KN motif and ankyrin repeat domain-containing protein 1	0.51
Q9BZD4	NUF2	Kinetochore protein Nuf2	0.51
O94903	PROSC	Proline synthase co-transcribed bacterial homolog protein	0.51
Q9BZ95	NSD3	Histone-lysine N-methyltransferase NSD3	0.51
Q58FG0	HS905	Putative heat shock protein HSP 90-alpha A5	0.52
O00299	CLIC1	Chloride intracellular channel protein 1	0.52
Q12904	AIMP1	Aminoacyl tRNA synthase complex-interacting multifunctional protein 1	0.52
O95865	DDAH2	N(G),N(G)-dimethylarginine dimethylaminohydrolase 2	0.52
O95999	BCL10	B-cell lymphoma/leukemia 10	0.52
O43414	ERI3	ERI1 exoribonuclease 3	0.52
Q8WTS6	SETD7	Histone-lysine N-methyltransferase SETD7	0.52
Q9H7C9	AAMDC	Mth938 domain-containing protein	0.52
Q08752	PPID	Peptidyl-prolyl cis-trans isomerase D	0.53
P00813	ADA	Adenosine deaminase	0.53
Q53SF7	COBL1	Cordon-bleu protein-like 1	0.53
P42892	ECE1	Endothelin-converting enzyme 1	0.53
P51580	TPMT	Thiopurine S-methyltransferase	0.53
P20908	CO5A1	Collagen alpha-1(V) chain	0.53
O15118	NPC1	Niemann-Pick C1 protein	0.53
Q07352	TISB	Zinc finger protein 36, C3H1 type-like 1	0.53
P01133	EGF	Pro-epidermal growth factor	0.53
Q8NG31	CASC5	Protein CASC5	0.53
P39210	MPV17	Protein Mpv17	0.53
Q6PCE3	PGM2L	Glucose 1,6-bisphosphate synthase	0.53
P62861	RS30	40S ribosomal protein S30	0.53
P52907	CAZA1	F-actin-capping protein subunit alpha-1	0.54
Q9NVE7	PANK4	Pantothenate kinase 4	0.54
P54709	AT1B3	Sodium/potassium-transporting ATPase subunit beta-3	0.54
O95372	LYPA2	Acyl-protein thioesterase 2	0.54
Q9UNE7	CHIP	E3 ubiquitin-protein ligase CHIP	0.54
Q9UBL3	ASH2L	Set1/Ash2 histone methyltransferase complex subunit ASH2	0.54
Q9NWV4	CA123	UPF0587 protein C1orf123	0.54
P26378	ELAV4	ELAV-like protein 4	0.54
O95167	NDUA3	NADH dehydrogenase [ubiquinone] 1 alpha subcomplex subunit 3	0.54
Q8IWB9	TEX2	Testis-expressed sequence 2 protein	0.54
O15173	PGRC2	Membrane-associated progesterone receptor component 2	0.55
Q14696	MESD	LDLR chaperone MESD	0.55
Q01081	U2AF1	Splicing factor U2AF 35 kDa subunit	0.55
P15927	RFA2	Replication protein A 32 kDa subunit	0.55
Q15154	PCM1	Pericentriolar material 1 protein	0.55
Q8NBN3	TM87A	Transmembrane protein 87A	0.55
P04004	VTNC	Vitronectin	0.55
Q9GZP4	PITH1	PITH domain-containing protein 1	0.55
Q8IVL5	P3H2	Prolyl 3-hydroxylase 2	0.55
Q8WV41	SNX33	Sorting nexin-33	0.55
Q96CD0	FBXL8	F-box/LRR-repeat protein 8	0.55
Q09666	AHNK	Neuroblast differentiation-associated protein AHNAK	0.56
Q9Y5K5	UCHL5	Ubiquitin carboxyl-terminal hydrolase isozyme L5	0.56
Q96C19	EFHD2	EF-hand domain-containing protein D2	0.56
P82979	SARNP	SAP domain-containing ribonucleoprotein	0.56
Q14194	DPYL1	Dihydropyrimidinase-related protein 1	0.56
P62910	RL32	60S ribosomal protein L32	0.56
P12532	KCRU	Creatine kinase U-type, mitochondrial	0.56
Q2TAC2	CCD57	Coiled-coil domain-containing protein 57	0.56
Q96QD8	S38A2	Sodium-coupled neutral amino acid transporter 2	0.56
Q7Z4W1	DCXR	L-xylulose reductase	0.56
Q6UWP2	DHR11	Dehydrogenase/reductase SDR family member 11	0.56
Q9NRX4	PHP14	14 kDa phosphohistidine phosphatase	0.56
Q9P0S9	TM14C	Transmembrane protein 14C	0.56
O43583	DENR	Density-regulated protein	0.56
P62826	RAN	GTP-binding nuclear protein Ran	0.57
Q16555	DPYL2	Dihydropyrimidinase-related protein 2	0.57
Q99497	PARK7	Protein deglycase DJ-1	0.57
P11233	RALA	Ras-related protein Ral-A	0.57
P16144	ITB4	Integrin beta-4	0.57
O60888	CUTA	Protein CutA	0.57
Q96MW1	CCD43	Coiled-coil domain-containing protein 43	0.57
A6NHL2	TBAL3	Tubulin alpha chain-like 3	0.58
O00273	DFFA	DNA fragmentation factor subunit alpha	0.58
P11234	RALB	Ras-related protein Ral-B	0.58
P26583	HMGB2	High mobility group protein B2	0.58
Q9Y613	FHOD1	FH1/FH2 domain-containing protein 1	0.58
Q9NP74	PALMD	Palmdelphin	0.58
P08651	NFIC	Nuclear factor 1 C-type	0.58
P21980	TGM2	Protein-glutamine gamma-glutamyltransferase 2	0.58
Q8NAV1	PR38A	Pre-mRNA-splicing factor 38A	0.58
Q8IZ21	PHAR4	Phosphatase and actin regulator 4	0.58
O60828	PQBP1	Polyglutamine-binding protein 1	0.58
P26038	MOES	Moesin	0.59
Q15599	NHRF2	Na(+)/H(+) exchange regulatory cofactor NHE-RF2	0.59
O60869	EDF1	Endothelial differentiation-related factor 1	0.59
Q00534	CDK6	Cyclin-dependent kinase 6	0.59
Q9Y6N5	SQRD	Sulfide:quinone oxidoreductase, mitochondrial	0.59
O95870	ABHGA	Abhydrolase domain-containing protein 16A	0.59
Q96S44	PRPK	TP53-regulating kinase	0.59
Q15056	IF4H	Eukaryotic translation initiation factor 4H	0.6
Q9P258	RCC2	Protein RCC2	0.6
P24534	EF1B	Elongation factor 1-beta	0.6
P28066	PSA5	Proteasome subunit alpha type-5	0.6
O43324	MCA3	Eukaryotic translation elongation factor 1 epsilon-1	0.6
P62273	RS29	40S ribosomal protein S29	0.6
Q9UHN6	TMEM2	Transmembrane protein 2	0.6
P02792	FRIL	Ferritin light chain	0.6
P43307	SSRA	Translocon-associated protein subunit alpha	0.6
O95168	NDUB4	NADH dehydrogenase [ubiquinone] 1 beta subcomplex subunit 4	0.6
Q9H267	VP33B	Vacuolar protein sorting-associated protein 33B	0.6
Q9H9P8	L2HDH	L-2-hydroxyglutarate dehydrogenase, mitochondrial	0.6
P07225	PROS	Vitamin K-dependent protein S	0.6
P31949	S10AB	Protein S100-A11	0.6
P0DMT0	MLN	Myoregulin	0.6
P46940	IQGA1	Ras GTPase-activating-like protein IQGAP1	0.61
P35613	BASI	Basigin	0.61
Q96HC4	PDLI5	PDZ and LIM domain protein 5	0.61
P08648	ITA5	Integrin alpha-5	0.61
P26447	S10A4	Protein S100-A4	0.61
P60903	S10AA	Protein S100-A10	0.61
Q9UFW8	CGBP1	CGG triplet repeat-binding protein 1	0.61
O95456	PSMG1	Proteasome assembly chaperone 1	0.61
Q02388	CO7A1	Collagen alpha-1(VII) chain	0.61
P54819	KAD2	Adenylate kinase 2, mitochondrial	0.62
Q03135	CAV1	Caveolin-1	0.62
Q9UDY4	DNJB4	DnaJ homolog subfamily B member 4	0.62
Q9H788	SH24A	SH2 domain-containing protein 4A	0.62
Q9Y312	AAR2	Protein AAR2 homolog	0.62
Q07954	LRP1	Prolow-density lipoprotein receptor-related protein 1	0.62
O60936	NOL3	Nucleolar protein 3	0.62
Q8WV24	PHLA1	Pleckstrin homology-like domain family A member 1	0.62
Q06830	PRDX1	Peroxiredoxin-1	0.63
P06737	PYGL	Glycogen phosphorylase, liver form	0.63
Q13838	DX39B	Spliceosome RNA helicase DDX39B	0.63
P17858	PFKAL	ATP-dependent 6-phosphofructokinase, liver type	0.63
P04844	RPN2	Dolichyl-diphosphooligosaccharide--protein glycosyltransferase subunit 2	0.63
P46013	KI67	Antigen KI-67	0.63
P41227	NAA10	N-alpha-acetyltransferase 10	0.63
P43121	MUC18	Cell surface glycoprotein MUC18	0.63
Q5TDH0	DDI2	Protein DDI1 homolog 2	0.63
P46778	RL21	60S ribosomal protein L21	0.63
Q9BU89	DOHH	Deoxyhypusine hydroxylase	0.63
Q9HB21	PKHA1	Pleckstrin homology domain-containing family A member 1	0.63
Q9ULC3	RAB23	Ras-related protein Rab-23	0.63
P61513	RL37A	60S ribosomal protein L37a	0.63
Q8WUH6	TM263	Transmembrane protein 263	0.63
Q16774	KGUA	Guanylate kinase	0.63
O95989	NUDT3	Diphosphoinositol polyphosphate phosphohydrolase 1	0.63
Q8N5D0	WDTC1	WD and tetratricopeptide repeats protein 1	0.63
Q8N257	H2B3B	Histone H2B type 3-B	0.64
P02794	FRIH	Ferritin heavy chain	0.64
O75396	SC22B	Vesicle-trafficking protein SEC22b	0.64
Q9Y3C6	PPIL1	Peptidyl-prolyl cis-trans isomerase-like 1	0.64
Q6NYC8	PPR18	Phostensin	0.64
Q8NE71	ABCF1	ATP-binding cassette sub-family F member 1	0.65
Q01433	AMPD2	AMP deaminase 2	0.65
P49257	LMAN1	Protein ERGIC-53	0.65
Q8IWE2	NXP20	Protein NOXP20	0.65
P62834	RAP1A	Ras-related protein Rap-1A	0.65
P52209	6PGD	6-phosphogluconate dehydrogenase, decarboxylating	0.66
P48634	PRC2A	Protein PRRC2A	0.66
P48506	GSH1	Glutamate--cysteine ligase catalytic subunit	0.66
P63162	RSMN	Small nuclear ribonucleoprotein-associated protein N	0.66
Q9NZ63	CI078	Uncharacterized protein C9orf78	0.66
P61586	RHOA	Transforming protein RhoA	0.66
P13646	K1C13	Keratin, type I cytoskeletal 13	1.51
Q02978	M2OM	Mitochondrial 2-oxoglutarate/malate carrier protein	1.51
Q92764	KRT35	Keratin, type I cuticular Ha5	1.51
Q96F86	EDC3	Enhancer of mRNA-decapping protein 3	1.51
P25205	MCM3	DNA replication licensing factor MCM3	1.52
Q10471	GALT2	Polypeptide N-acetylgalactosaminyltransferase 2	1.52
Q86WA8	LONP2	Lon protease homolog 2, peroxisomal	1.52
P18858	DNLI1	DNA ligase 1	1.53
O00461	GOLI4	Golgi integral membrane protein 4	1.53
P23368	MAOM	NAD-dependent malic enzyme, mitochondrial	1.53
O60524	NEMF	Nuclear export mediator factor NEMF	1.53
Q96KP4	CNDP2	Cytosolic non-specific dipeptidase	1.53
O14965	AURKA	Aurora kinase A	1.53
A6NDG6	PGP	Phosphoglycolate phosphatase	1.53
Q6P3W7	SCYL2	SCY1-like protein 2	1.53
Q15904	VAS1	V-type proton ATPase subunit S1	1.54
Q8NBJ4	GOLM1	Golgi membrane protein 1	1.54
Q13423	NNTM	NAD(P) transhydrogenase, mitochondrial	1.55
Q9P0K7	RAI14	Ankycorbin	1.55
Q9UI30	TR112	Multifunctional methyltransferase subunit TRM112-like protein	1.56
P30533	AMRP	Alpha-2-macroglobulin receptor-associated protein	1.56
P82933	RT09	28S ribosomal protein S9, mitochondrial	1.56
Q9NUI1	DECR2	Peroxisomal 2,4-dienoyl-CoA reductase	1.56
O75165	DJC13	DnaJ homolog subfamily C member 13	1.56
Q9NZM1	MYOF	Myoferlin	1.57
Q29940	1B59	HLA class I histocompatibility antigen, B-59 alpha chain	1.57
P30492	1B54	HLA class I histocompatibility antigen, B-54 alpha chain	1.57
Q68E01	INT3	Integrator complex subunit 3	1.57
A3KMH1	VWA8	von Willebrand factor A domain-containing protein 8	1.57
P49736	MCM2	DNA replication licensing factor MCM2	1.58
O43292	GPAA1	Glycosylphosphatidylinositol anchor attachment 1 protein	1.58
P16278	BGAL	Beta-galactosidase	1.59
P16435	NCPR	NADPH--cytochrome P450 reductase	1.59
Q4J6C6	PPCEL	Prolyl endopeptidase-like	1.59
Q9H6S0	YTDC2	Probable ATP-dependent RNA helicase YTHDC2	1.6
Q8N2K0	ABD12	Monoacylglycerol lipase ABHD12	1.61
Q02818	NUCB1	Nucleobindin-1	1.61
Q9UBM7	DHCR7	7-dehydrocholesterol reductase	1.61
P47895	AL1A3	Aldehyde dehydrogenase family 1 member A3	1.61
P12955	PEPD	Xaa-Pro dipeptidase	1.61
P33993	MCM7	DNA replication licensing factor MCM7	1.62
Q8IVT2	MISP	Mitotic interactor and substrate of PLK1	1.63
Q99805	TM9S2	Transmembrane 9 superfamily member 2	1.63
Q2M2I8	AAK1	AP2-associated protein kinase 1	1.63
Q8WTW3	COG1	Conserved oligomeric Golgi complex subunit 1	1.63
P07099	HYEP	Epoxide hydrolase 1	1.64
Q12907	LMAN2	Vesicular integral-membrane protein VIP36	1.64
O14975	S27A2	Very long-chain acyl-CoA synthetase	1.64
Q6ZRV2	FA83H	Protein FAM83H	1.64
P43353	AL3B1	Aldehyde dehydrogenase family 3 member B1	1.64
Q8TBB5	KLDC4	Kelch domain-containing protein 4	1.64
Q9BU61	NDUF3	NADH dehydrogenase [ubiquinone] 1 alpha subcomplex assembly factor 3	1.64
P62906	RL10A	60S ribosomal protein L10a	1.66
Q9H3K2	GHITM	Growth hormone-inducible transmembrane protein	1.67
Q6IAN0	DRS7B	Dehydrogenase/reductase SDR family member 7B	1.67
Q8IUC4	RHPN2	Rhophilin-2	1.67
P07339	CATD	Cathepsin D	1.68
P50995	ANX11	Annexin A11	1.68
O15294	OGT1	UDP-N-acetylglucosamine--peptide N-acetylglucosaminyltransferase 110 kDa subunit	1.68
O76021	RL1D1	Ribosomal L1 domain-containing protein 1	1.68
P15559	NQO1	NAD(P)H dehydrogenase [quinone] 1	1.68
Q16881	TRXR1	Thioredoxin reductase 1, cytoplasmic	1.69
Q9HA77	SYCM	Probable cysteine--tRNA ligase, mitochondrial	1.69
Q9UBU8	MO4L1	Mortality factor 4-like protein 1	1.69
Q96GD4	AURKB	Aurora kinase B	1.69
P33992	MCM5	DNA replication licensing factor MCM5	1.7
P51648	AL3A2	Fatty aldehyde dehydrogenase	1.71
P0CG30	GSTT2	Glutathione S-transferase theta-2B	1.71
Q8N2G8	GHDC	GH3 domain-containing protein	1.71
Q16850	CP51A	Lanosterol 14-alpha demethylase	1.72
P49137	MAPK2	MAP kinase-activated protein kinase 2	1.72
P31749	AKT1	RAC-alpha serine/threonine-protein kinase	1.72
Q9Y4B6	VPRBP	Protein VPRBP	1.73
O95340	PAPS2	Bifunctional 3'-phosphoadenosine 5'-phosphosulfate synthase 2	1.74
O00411	RPOM	DNA-directed RNA polymerase, mitochondrial	1.74
Q99797	MIPEP	Mitochondrial intermediate peptidase	1.74
Q9NQ88	TIGAR	Fructose-2,6-bisphosphatase TIGAR	1.74
Q13421	MSLN	Mesothelin	1.74
P61599	NAA20	N-alpha-acetyltransferase 20	1.74
Q96AQ6	PBIP1	Pre-B-cell leukemia transcription factor-interacting protein 1	1.75
Q9HAU0	PKHA5	Pleckstrin homology domain-containing family A member 5	1.76
Q9BWS9	CHID1	Chitinase domain-containing protein 1	1.76
Q9NPL8	TIDC1	Complex I assembly factor TIMMDC1, mitochondrial	1.76
Q13751	LAMB3	Laminin subunit beta-3	1.77
P13645	K1C10	Keratin, type I cytoskeletal 10	1.78
O76070	SYUG	Gamma-synuclein	1.78
Q13315	ATM	Serine-protein kinase ATM	1.79
Q8NB46	ANR52	Serine/threonine-protein phosphatase 6 regulatory ankyrin repeat subunit C	1.8
Q9NYY8	FAKD2	FAST kinase domain-containing protein 2	1.81
Q08AF3	SLFN5	Schlafen family member 5	1.82
P53350	PLK1	Serine/threonine-protein kinase PLK1	1.83
Q96ME7	ZN512	Zinc finger protein 512	1.83
P09110	THIK	3-ketoacyl-CoA thiolase, peroxisomal	1.84
O94788	AL1A2	Retinal dehydrogenase 2	1.84
Q96CV9	OPTN	Optineurin	1.85
Q7Z2E3	APTX	Aprataxin	1.85
Q9BW91	NUDT9	ADP-ribose pyrophosphatase, mitochondrial	1.86
Q9UMX5	NENF	Neudesin	1.86
P62256	UBE2H	Ubiquitin-conjugating enzyme E2 H	1.88
Q92995	UBP13	Ubiquitin carboxyl-terminal hydrolase 13	1.89
P83731	RL24	60S ribosomal protein L24	1.9
Q93063	EXT2	Exostosin-2	1.9
Q9H902	REEP1	Receptor expression-enhancing protein 1	1.9
Q5ZPR3	CD276	CD276 antigen	1.9
Q29963	1C06	HLA class I histocompatibility antigen, Cw-6 alpha chain	1.91
O95905	ECD	Protein ecdysoneless homolog	1.91
Q92889	XPF	DNA repair endonuclease XPF	1.91
Q53H96	P5CR3	Pyrroline-5-carboxylate reductase 3	1.92
Q5BJF2	TMM97	Transmembrane protein 97	1.92
Q9H0M0	WWP1	NEDD4-like E3 ubiquitin-protein ligase WWP1	1.92
P27540	ARNT	Aryl hydrocarbon receptor nuclear translocator	1.93
P35790	CHKA	Choline kinase alpha	1.94
P37268	FDFT	Squalene synthase	1.94
Q8IZV5	RDH10	Retinol dehydrogenase 10	1.94
P47224	MSS4	Guanine nucleotide exchange factor MSS4	1.94
Q8WVI0	SMIM4	Small integral membrane protein 4	1.94
O60294	TYW4	tRNA wybutosine-synthesizing protein 4	1.96
Q2VPK5	CTU2	Cytoplasmic tRNA 2-thiolation protein 2	1.96
Q96Q07	BTBD9	BTB/POZ domain-containing protein 9	1.98
Q7Z2K8	GRIN1	G protein-regulated inducer of neurite outgrowth 1	1.98
Q8TDP1	RNH2C	Ribonuclease H2 subunit C	1.98
Q96MT1	RN145	RING finger protein 145	1.98
Q16763	UBE2S	Ubiquitin-conjugating enzyme E2 S	1.99
Q13501	SQSTM	Sequestosome-1	2
Q96CP6	GRM1A	GRAM domain-containing protein 1A	2
O60513	B4GT4	Beta-1,4-galactosyltransferase 4	2
O43826	G6PT1	Glucose-6-phosphate translocase	2
Q15147	PLCB4	1-phosphatidylinositol 4,5-bisphosphate phosphodiesterase beta-4	2.01
O00767	ACOD	Acyl-CoA desaturase	2.02
P19438	TNR1A	Tumor necrosis factor receptor superfamily member 1A	2.02
P06280	AGAL	Alpha-galactosidase A	2.03
P41221	WNT5A	Protein Wnt-5a	2.03
O96005	CLPT1	Cleft lip and palate transmembrane protein 1	2.05
O14628	ZN195	Zinc finger protein 195	2.05
P42695	CNDD3	Condensin-2 complex subunit D3	2.05
P17813	EGLN	Endoglin	2.07
Q9BW83	IFT27	Intraflagellar transport protein 27 homolog	2.07
Q6IA69	NADE	Glutamine-dependent NAD(+) synthetase	2.07
O60346	PHLP1	PH domain leucine-rich repeat-containing protein phosphatase 1	2.07
Q9UL63	MKLN1	Muskelin	2.08
Q9HD20	AT131	Manganese-transporting ATPase 13A1	2.09
Q9BS40	LXN	Latexin	2.09
Q68CZ2	TENS3	Tensin-3	2.1
O95822	DCMC	Malonyl-CoA decarboxylase, mitochondrial	2.1
Q9UBI1	COMD3	COMM domain-containing protein 3	2.11
Q03169	TNAP2	Tumor necrosis factor alpha-induced protein 2	2.11
Q6R327	RICTR	Rapamycin-insensitive companion of mTOR	2.12
Q13510	ASAH1	Acid ceramidase	2.12
Q9UPR0	PLCL2	Inactive phospholipase C-like protein 2	2.13
Q9UK73	FEM1B	Protein fem-1 homolog B	2.16
Q14534	ERG1	Squalene monooxygenase	2.16
Q8TB22	SPT20	Spermatogenesis-associated protein 20	2.16
Q9NPR9	GP108	Protein GPR108	2.16
O60942	MCE1	mRNA-capping enzyme	2.17
O14832	PAHX	Phytanoyl-CoA dioxygenase, peroxisomal	2.18
Q16698	DECR	2,4-dienoyl-CoA reductase, mitochondrial	2.19
Q92522	H1X	Histone H1x	2.2
Q9Y3E7	CHMP3	Charged multivesicular body protein 3	2.2
O75147	OBSL1	Obscurin-like protein 1	2.2
O76024	WFS1	Wolframin	2.22
Q8WVT3	TPC12	Trafficking protein particle complex subunit 12	2.22
Q96SQ5	ZN587	Zinc finger protein 587	2.22
Q13642	FHL1	Four and a half LIM domains protein 1	2.23
O15127	SCAM2	Secretory carrier-associated membrane protein 2	2.23
Q9UH62	ARMX3	Armadillo repeat-containing X-linked protein 3	2.23
Q9H0E3	SP130	Histone deacetylase complex subunit SAP130	2.24
O60344	ECE2	Endothelin-converting enzyme 2	2.26
O15484	CAN5	Calpain-5	2.26
P13196	HEM1	5-aminolevulinate synthase, nonspecific, mitochondrial	2.26
Q86VU5	CMTD1	Catechol O-methyltransferase domain-containing protein 1	2.28
P50914	RL14	60S ribosomal protein L14	2.29
Q9NX05	F120C	Constitutive coactivator of PPAR-gamma-like protein 2	2.29
Q9UH17	ABC3B	DNA dC->dU-editing enzyme APOBEC-3B	2.3
O95361	TRI16	Tripartite motif-containing protein 16	2.32
P54802	ANAG	Alpha-N-acetylglucosaminidase	2.36
Q10472	GALT1	Polypeptide N-acetylgalactosaminyltransferase 1	2.36
P35610	SOAT1	Sterol O-acyltransferase 1	2.36
O14735	CDIPT	CDP-diacylglycerol--inositol 3-phosphatidyltransferase	2.36
Q9BSB4	ATGA1	Autophagy-related protein 101	2.36
Q07020	RL18	60S ribosomal protein L18	2.39
P98179	RBM3	RNA-binding protein 3	2.39
Q7LGC8	CHST3	Carbohydrate sulfotransferase 3	2.4
Q6N075	MFSD5	Molybdate-anion transporter	2.41
Q8IYW5	RN168	E3 ubiquitin-protein ligase RNF168	2.41
Q63HN8	RN213	E3 ubiquitin-protein ligase RNF213	2.42
O75417	DPOLQ	DNA polymerase theta	2.44
Q5HYK3	COQ5	2-methoxy-6-polyprenyl-1,4-benzoquinol methylase, mitochondrial	2.48
P55011	S12A2	Solute carrier family 12 member 2	2.54
P62805	H4	Histone H4	2.55
Q29718	1B82	HLA class I histocompatibility antigen, B-82 alpha chain	2.57
P32456	GBP2	Guanylate-binding protein 2	2.57
O15228	GNPAT	Dihydroxyacetone phosphate acyltransferase	2.61
Q71DI3	H32	Histone H3.2	2.65
P84243	H33	Histone H3.3	2.65
Q8N961	ABTB2	Ankyrin repeat and BTB/POZ domain-containing protein 2	2.65
Q9Y3R0	GRIP1	Glutamate receptor-interacting protein 1	2.66
Q9NWU1	OXSM	3-oxoacyl-[acyl-carrier-protein] synthase, mitochondrial	2.67
Q7Z5L9	I2BP2	Interferon regulatory factor 2-binding protein 2	2.7
Q9Y2C4	EXOG	Nuclease EXOG, mitochondrial	2.72
Q9H4K7	MTG2	Mitochondrial ribosome-associated GTPase 2	2.74
P11413	G6PD	Glucose-6-phosphate 1-dehydrogenase	2.79
Q9NYV6	RRN3	RNA polymerase I-specific transcription initiation factor RRN3	2.8
O43759	SNG1	Synaptogyrin-1	2.8
Q13322	GRB10	Growth factor receptor-bound protein 10	2.82
Q2TAA5	ALG11	GDP-Man:Man(3)GlcNAc(2)-PP-Dol alpha-1,2-mannosyltransferase	2.83
Q96DX5	ASB9	Ankyrin repeat and SOCS box protein 9	2.84
P29373	RABP2	Cellular retinoic acid-binding protein 2	2.86
O95900	TRUB2	Probable tRNA pseudouridine synthase 2	2.88
Q86Y79	PTH	Probable peptidyl-tRNA hydrolase	2.88
P16930	FAAA	Fumarylacetoacetase	2.9
A8MQ03	CRTP1	Cysteine-rich tail protein 1	2.98
P38571	LICH	Lysosomal acid lipase/cholesteryl ester hydrolase	3
Q56VL3	OCAD2	OCIA domain-containing protein 2	3.15
P19838	NFKB1	Nuclear factor NF-kappa-B p105 subunit	3.17
P36268	GGT2	Inactive gamma-glutamyltranspeptidase 2	3.19
Q01995	TAGL	Transgelin	3.2
Q9UI15	TAGL3	Transgelin-3	3.22
Q9HCG1	ZN160	Zinc finger protein 160	3.41
Q01581	HMCS1	Hydroxymethylglutaryl-CoA synthase, cytoplasmic	3.58
Q8TBN0	R3GEF	Guanine nucleotide exchange factor for Rab-3A	3.71
Q9UI42	CBPA4	Carboxypeptidase A4	3.76
Q6UX53	MET7B	Methyltransferase-like protein 7B	3.78
P33552	CKS2	Cyclin-dependent kinases regulatory subunit 2	3.83
Q7Z7A3	CTU1	Cytoplasmic tRNA 2-thiolation protein 1	3.86
O95848	NUD14	Uridine diphosphate glucose pyrophosphatase	3.9
O75503	CLN5	Ceroid-lipofuscinosis neuronal protein 5	3.93
P50053	KHK	Ketohexokinase	4
Q09328	MGT5A	Alpha-1,6-mannosylglycoprotein 6-beta-N-acetylglucosaminyltransferase A	4.13
P27338	AOFB	Amine oxidase [flavin-containing] B	4.48
P52594	AGFG1	Arf-GAP domain and FG repeat-containing protein 1	4.64
P16401	H15	Histone H1.5	4.65
P0CG21	NHLC4	NHL-repeat-containing protein 4	4.67
Q96JP2	MY15B	Unconventional myosin-XVB	4.92
Q9BRB3	PIGQ	Phosphatidylinositol N-acetylglucosaminyltransferase subunit Q	6.34
P16403	H12	Histone H1.2	7.11
Q02539	H11	Histone H1.1	7.11
P05187	PPB1	Alkaline phosphatase, placental type	10.01
P28676	GRAN	Grancalcin	10.34
P07305	H10	Histone H1.0	12.1
